# Supplementary material
Source: PubMed Central journal article supplement (PMC3033298)
Supplement: 1018974108_pnas.201018974SI.pdf [file 1018974108_pnas.201018974SI.pdf]

# Supporting Information

Kim et al. 10.1073/pnas.1018974108

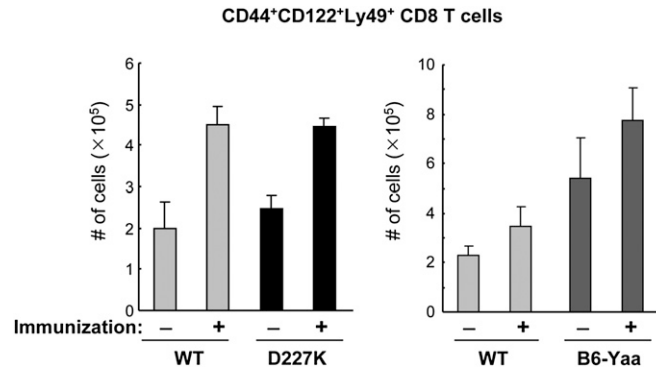

**Fig S1.** Number of CD44<sup>+</sup>CD122<sup>+</sup>Ly49<sup>+</sup> CD8 cells in B6(WT), B6.Qa-1(D227K), and B6-Yaa mice. At 7 d after i.p. immunization with 100  $\mu$ g of KLH in CFA, the number of CD44<sup>+</sup>CD122<sup>+</sup>Ly49<sup>+</sup> CD8 T cells was measured in spleen cells from 2-mo-old B6(WT), B6.Qa-1(D227K), and B6-Yaa mice and nonimmunized controls.

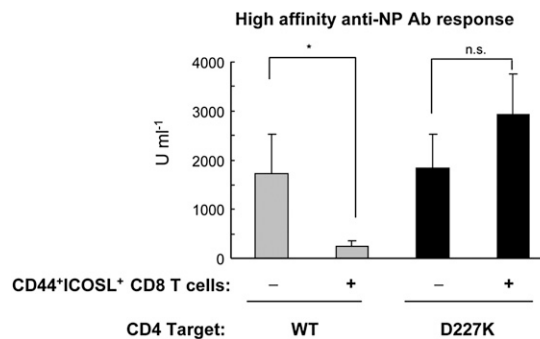

**Fig. S2.** Suppressive activity by CD44<sup>+</sup>ICOSL<sup>+</sup> CD8<sup>+</sup> T cells. Ab response after transfer of B, CD4, and CD8 cells into *Rag2*<sup>-/-</sup> hosts. Here  $2 \times 10^6$  WT naïve B cells were transferred along with  $0.5 \times 10^6$  CD25<sup>+</sup>-depleted CD4 cells from B6.Qa-1(WT) or B6.Qa-1(D227K) mice into *Rag2*<sup>-/-</sup> hosts. CD44<sup>+</sup>ICOSL<sup>+</sup> CD8<sup>+</sup> T cells were sorted by FACS from spleen cells of KLH/CFA-immunized WT (B6) mice, and  $0.15 \times 10^6$  sorted CD44<sup>+</sup>ICOSL<sup>+</sup> CD8 cells were transferred into *Rag2*<sup>-/-</sup> hosts. Immediately after cell transfer, the *Rag2*<sup>-/-</sup> hosts were immunized i.p. with 100  $\mu$ g of NP19-KLH in CFA. At day 10, mice were challenged i.p. with 50  $\mu$ g of NP<sub>19</sub>-KLH in IFA, and high-affinity NP-specific Ab responses were measured by ELISA 7 d later.
